GOPAL KRISHNA, M.D.

Professor

Department of Anesthesia

ROY WESTCOTT

Design and Fabrication Engineer

Department of Clinical Engineering

Indiana University School of Medicine

Indianapolis, Indiana 46223

#### REFERENCES

1. Nixon C, Hirsch NP, Ormerod LEC, Johnson G: Nuclear magnetic resonance. Its implications for the anaesthetist. *Anaesthesia* 41:131-137, 1986
2. Roth JL, Nugent M, Gray JE, Julsrud PR, Berquist TH, Sill JC, Kispert DB: Patient monitoring during magnetic resonance imaging. *ANESTHESIOLOGY* 62:80-83, 1985

(Accepted for publication November 30, 1987.)

Anesthesiology  
68:641, 1988

### A Presumed Case of Dextran-induced Anaphylactoid Reaction

*To the Editor:*—The article by Bernstein *et al.*<sup>1</sup> presents a severe reaction to dextran. However, the authors do not provide sufficient evidence that this reaction was a case of dextran-induced anaphylactoid reaction (DIAR). By virtue of his previous exposure to dextran, the patient described certainly was at risk of developing dextran reactive antibodies, and sustaining an allergic reaction to dextran on subsequent exposure. The temporal relationship between the dextran 40 infusion and the precipitous fall in arterial blood pressure was typical of DIAR.<sup>2</sup> Clinically, what mitigates against DIAR, in this instance, is the reported absence of skin manifestations (flush, erythema, urticaria) and bronchospasm.

Ljungstrom *et al.*<sup>3</sup> stated that the diagnosis of DIAR was dependent on circulatory symptoms being preceded by, or occurring in combination with, cutaneous symptoms or bronchospasm. Furthermore, for diagnosis of reactions of grade III and IV, dextran reactive antibody titers should be elevated in serum drawn before the reaction (obtainable from blood drawn preoperatively for cross-matching), and considerably reduced after the reaction.<sup>4</sup> Bernstein *et al.* did not do this. Examining this report by these criteria, a factor other than dextran would be judged to be the probable causative agent, and the reaction to dextran, in this instance, would be designated as non-likely.<sup>3</sup> Lacking the ability to measure dextran reactive antibody titers, the simple presence of an allergic reaction may be elicited through an abrupt rise in serial plasma histamine levels, and a sudden fall in serial plasma complement proteins C<sub>3</sub> and C<sub>4</sub> levels.<sup>5</sup> Unfortunately, these latter tests fail to elucidate the agent responsible for the reaction.

Large series of patients have shown that it is possible to confirm DIAR with a reasonable degree of certainty on the basis of specific clinical observations combined with laboratory investigations.<sup>2,3</sup> Bernstein *et al.* have made a presumptive diagnosis of a dextran-induced anaphylactoid reaction, without either of these.

JAMES A. JANZEN, M.D.

Resident in Anaesthesia

Department of Anaesthesia

University of British Columbia

Vancouver General Hospital

910 West 10th Avenue

Vancouver, British Columbia, Canada

V5Z 4E3

#### REFERENCES

1. Bernstein RL, Rosenberg AD, Yoro Pada E, Jaffe FF: A severe reaction to dextran despite hapten inhibition. *ANESTHESIOLOGY* 67:567-569, 1987
2. Ljungstrom K-G, Renck H, Strandberg K, Hedin H, Richter W, Widerlov E: Adverse reactions to dextran in Sweden 1970-1979. *Acta Chir Scand* 149:253-262, 1983
3. Ljungstrom K-G, Renck H, Hedin H, Richter W, Rosberg B: Prevention of dextran-induced anaphylactic reactions by hapten inhibition. I. A Scandinavian multicenter study on the effects of 10 ml dextran 1, 15% administered before dextran 70 or dextran 40. *Acta Chir Scand* 149:341-348, 1983
4. Hedin H, Richter W: Pathomechanisms of dextran-induced anaphylactoid/anaphylactic reactions in man. *Int Arch Allergy Appl Immunol* 68:122-126, 1982
5. Moudgil GC: Anaesthesia and allergic drug reactions. *Can Anaesth Soc J* 33:400-414, 1986

(Accepted for publication December 2, 1987.)

Anesthesiology  
68:641-642, 1988

*In Reply:*—We have, unfortunately, witnessed numerous episodes of DIAR. Severe hypotension without cu-

taneous manifestations or bronchospasm was common. While one might anticipate these to occur, Lungstrom's
